# Supplementary material for: Microfluidic solution-processed organic and perovskite nanowires fabricated for field-effect transistors and photodetectors
Source: Royal Society of Chemistry journal article supplement (doi:10.1039/c9tc05628a), 2020-01-01
Supplement: c9tc05628a1.pdf [file c9tc05628a1.pdf]

## **Microfluidic Solution-Processed Organic and Perovskite Nanowires Fabricated for Field-Effect Transistors and Photodetectors**

Ping-An Chen<sup>1</sup>, Jing Guo<sup>1</sup>, Mehdi Nouri<sup>2</sup>, Quanyang Tao<sup>3</sup>, Zhiwei Li<sup>3</sup>, Qianyuan Li<sup>3</sup>,  
Lulu Du<sup>4</sup>, Huajie Chen<sup>4</sup>, Zaizai Dong<sup>5,6</sup>, Lingqian Chang<sup>5,6\*</sup>, Yuan Liu<sup>3</sup>, Lei Liao<sup>1</sup>,  
Yuanyuan Hu<sup>1\*</sup>

<sup>1</sup>Key Laboratory for Micro/Nano Optoelectronic Devices of Ministry of Education and Hunan Provincial Key Laboratory of Low-Dimensional Structural Physics and Devices, School of Physics and Electronics, Hunan University, Changsha 410082, China

<sup>2</sup>Department of Biomedical Engineering, University of North Texas, Denton, TX, 76207, US

<sup>3</sup>Hunan Key Laboratory of Two-Dimensional Materials and State Key Laboratory for Chemo/Biosensing and Chemometrics, School of Physics and Electronics, Hunan University, Changsha 410082, China

<sup>4</sup>Key Laboratory of Environmentally Friendly Chemistry and Applications of Ministry of Education, College of Chemistry, Xiangtan University, Xiangtan 411105, China

<sup>5</sup>School of Biological Science and Medical Engineering, Beihang University, Beijing 100083, China

<sup>6</sup>Institute of Nanotechnology for Single Cell Analysis (INSCA), Beijing Advanced Innovation Center for Biomedical Engineering, Beihang University, Beijing 100083, China

**(a)**

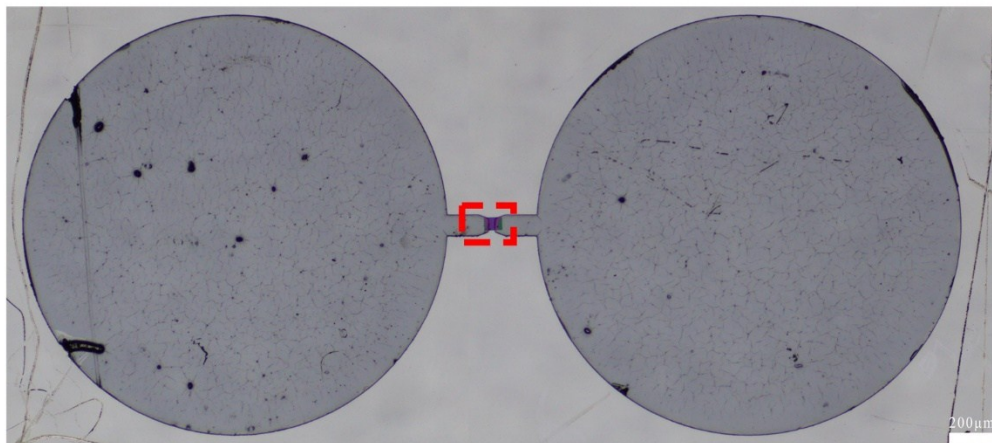

**(b)**

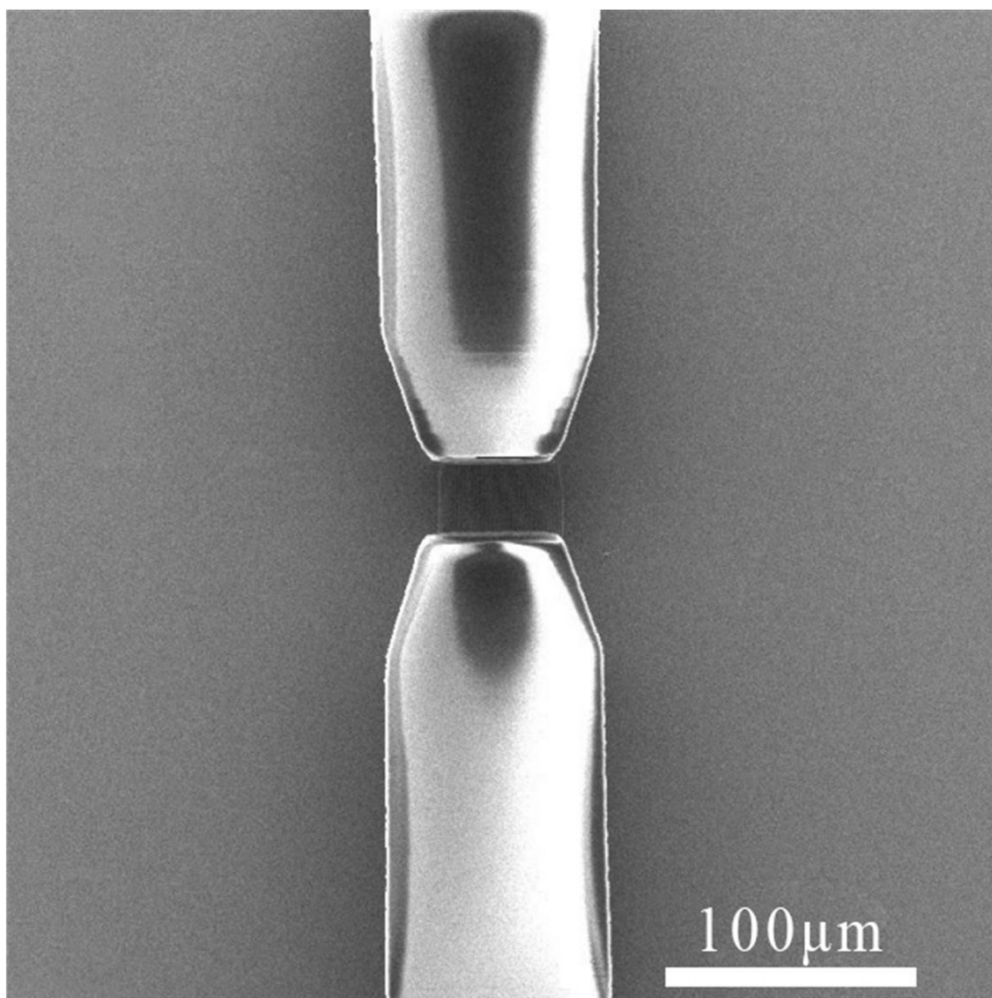

**Figure S1.** (a) Optical microscope image of nanowires template. (b) SEM image of nanowires template.

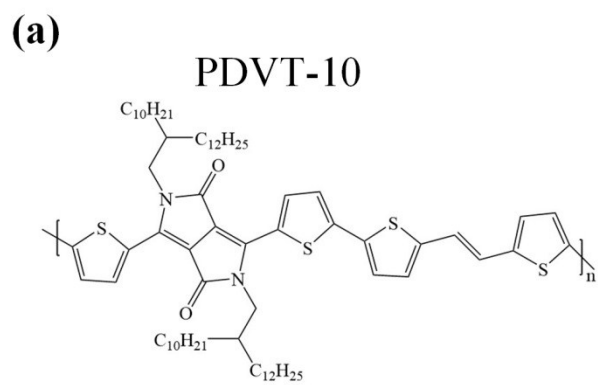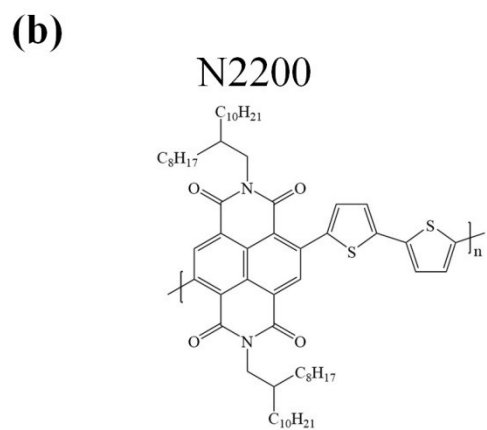

**Figure S2.** The molecule structures of (a) PDVT-10 and (b) N2200.

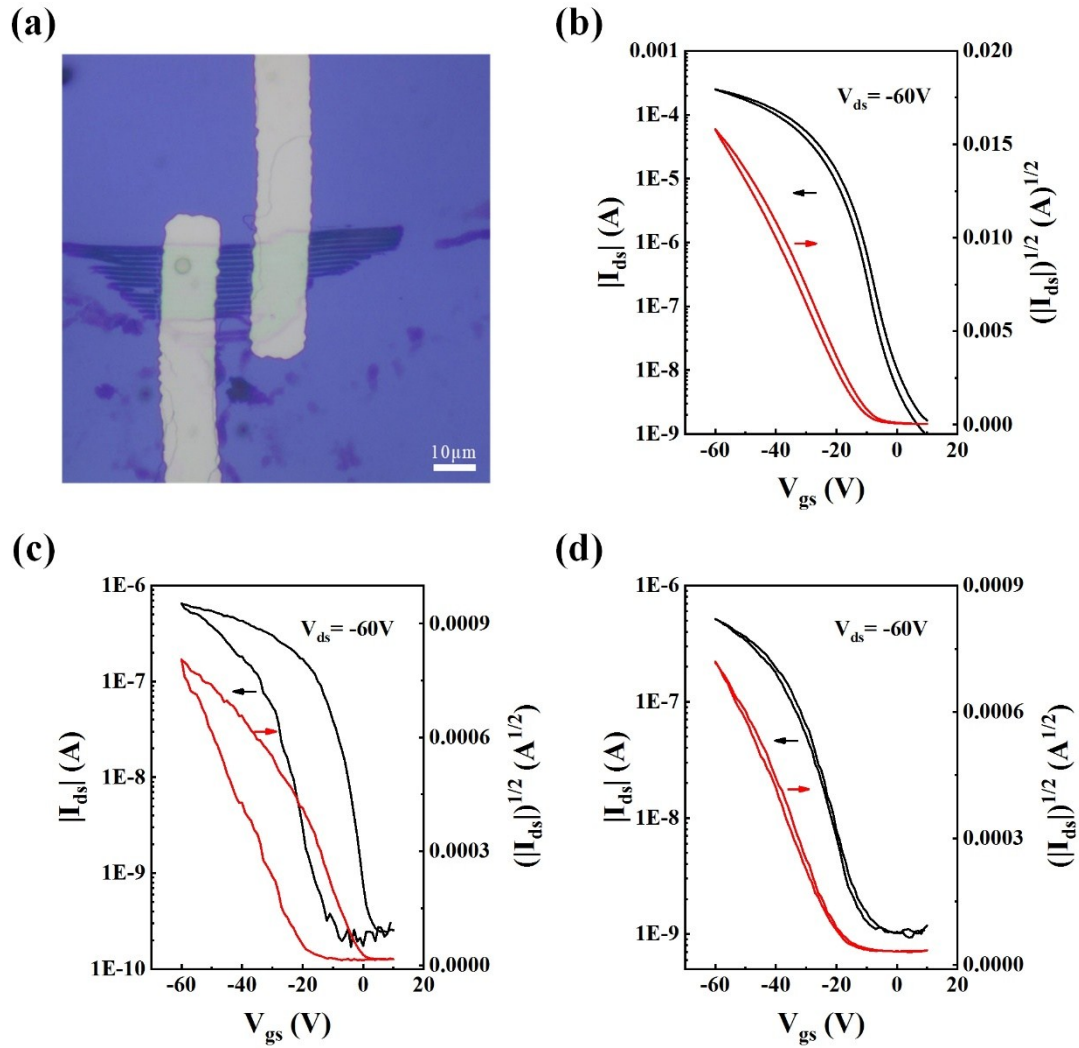

**Figure S3.** (a) Device appearance and channel region. (b) Transfer characteristics ( $I_{ds}$ - $V_{gs}$ ) of PDVT-10 thin-film transistors (BGTC) with  $L = 30 \mu\text{m}$  and  $W = 1000 \mu\text{m}$ , exhibiting a hole mobility of  $0.32 \text{ cm}^2\text{V}^{-1}\text{s}^{-1}$  at  $V_{ds} = -60 \text{ V}$ . (c) Transfer characteristics ( $I_{ds}$ - $V_{gs}$ ) of PDVT-10 nanowire transistors (BGBC) with  $L = 20 \mu\text{m}$  and  $W = 9 \mu\text{m}$ , exhibiting a hole mobility of  $0.06 \text{ cm}^2\text{V}^{-1}\text{s}^{-1}$  at  $V_{ds} = -60 \text{ V}$ . (d) Transfer characteristics ( $I_{ds}$ - $V_{gs}$ ) of PDVT-10 nanowire transistors (TGBC) with  $L = 20 \mu\text{m}$  and  $W = 6.3 \mu\text{m}$ , exhibiting a hole mobility of  $0.1 \text{ cm}^2\text{V}^{-1}\text{s}^{-1}$  at  $V_{ds} = -60 \text{ V}$ .

(a)

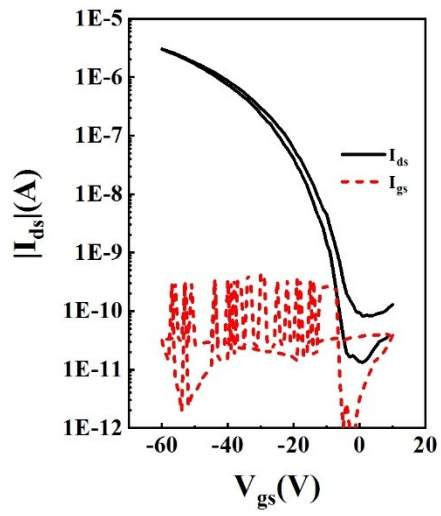

(b)

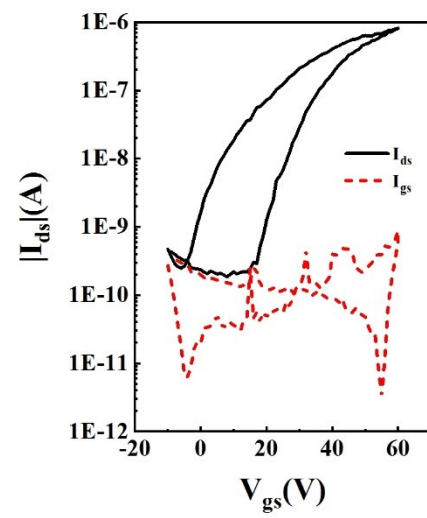

**Figure S4.** Transfer characteristics of (a) PDVT-10 nanowire transistor (BGTC) and (b) N2200 nanowire transistors (BGBC) at  $|V_{ds}|=60$  V.

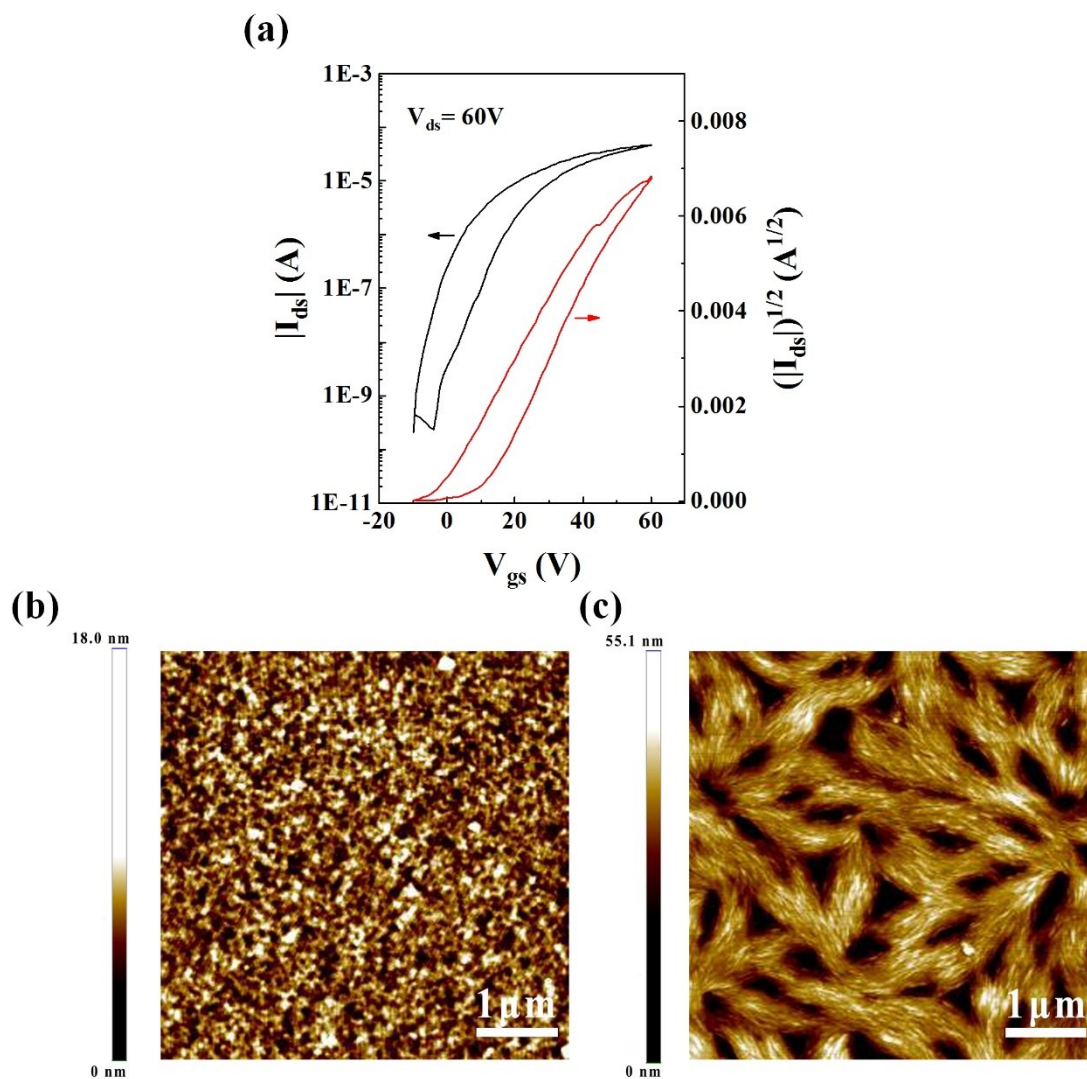

**Figure S5.** (a) Transfer characteristics ( $I_{ds}$ - $V_{gs}$ ) of a typical N2200 thin-film transistors (BGBC) with  $L = 20 \mu\text{m}$  and  $W = 1000 \mu\text{m}$ , exhibiting a hole mobility of  $0.02 \text{ cm}^2\text{V}^{-1}\text{s}^{-1}$  at  $V_{ds} = 60 \text{ V}$ . AFM images of (b) PDVT-10 and (c) N2200 thin-film on OTS-modified Si/SiO<sub>2</sub> substrates, respectively.

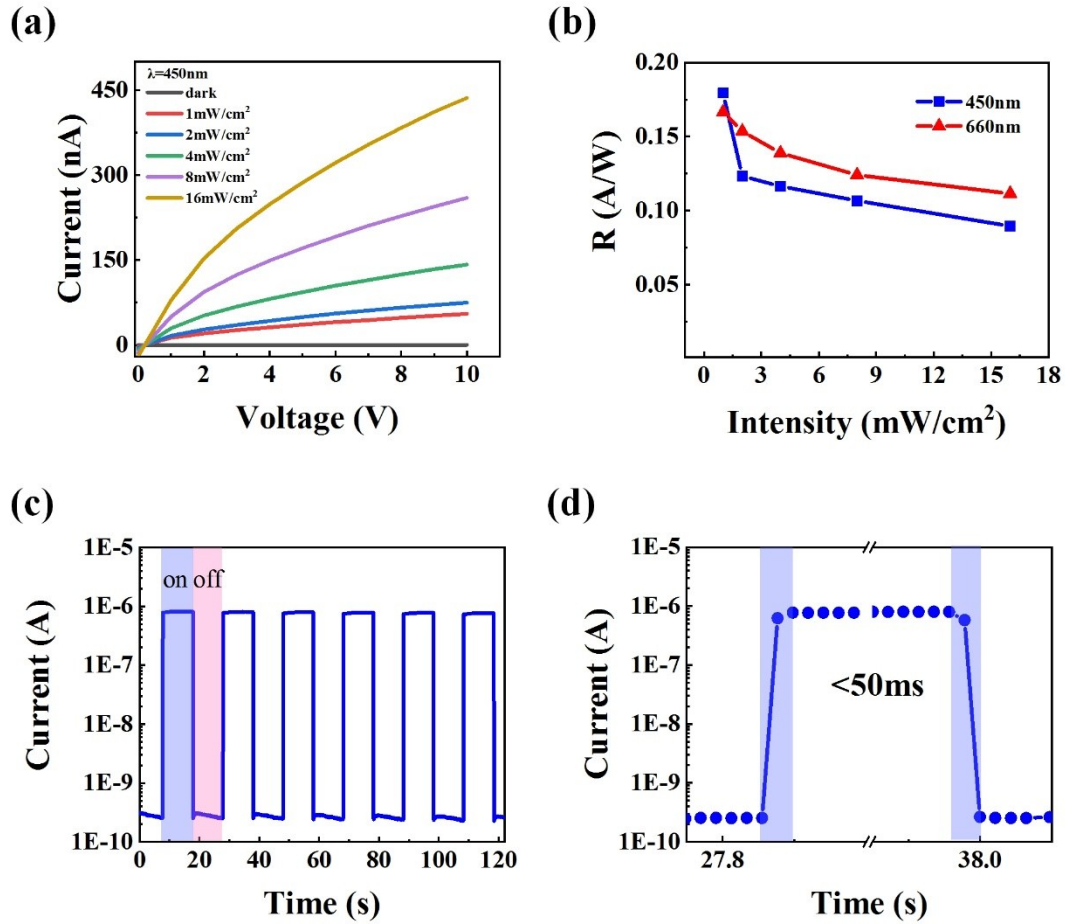

**Figure S6.** (a)  $I$ - $V$  curves of the pristine MAPbI<sub>3</sub> thin-film under illumination of 450 nm with a power density varying from 0 to 16 mW/cm<sup>2</sup>. (b) Responsivity as a function of the light power density for pristine MAPbI<sub>3</sub> film photodetectors at 5 V and wavelengths of 450 nm and 660 nm. (c) The time-dependent photocurrent measurement of MAPbI<sub>3</sub> film photodetector under illumination of 450 nm at 5 V, and (d) the rise and fall times response.

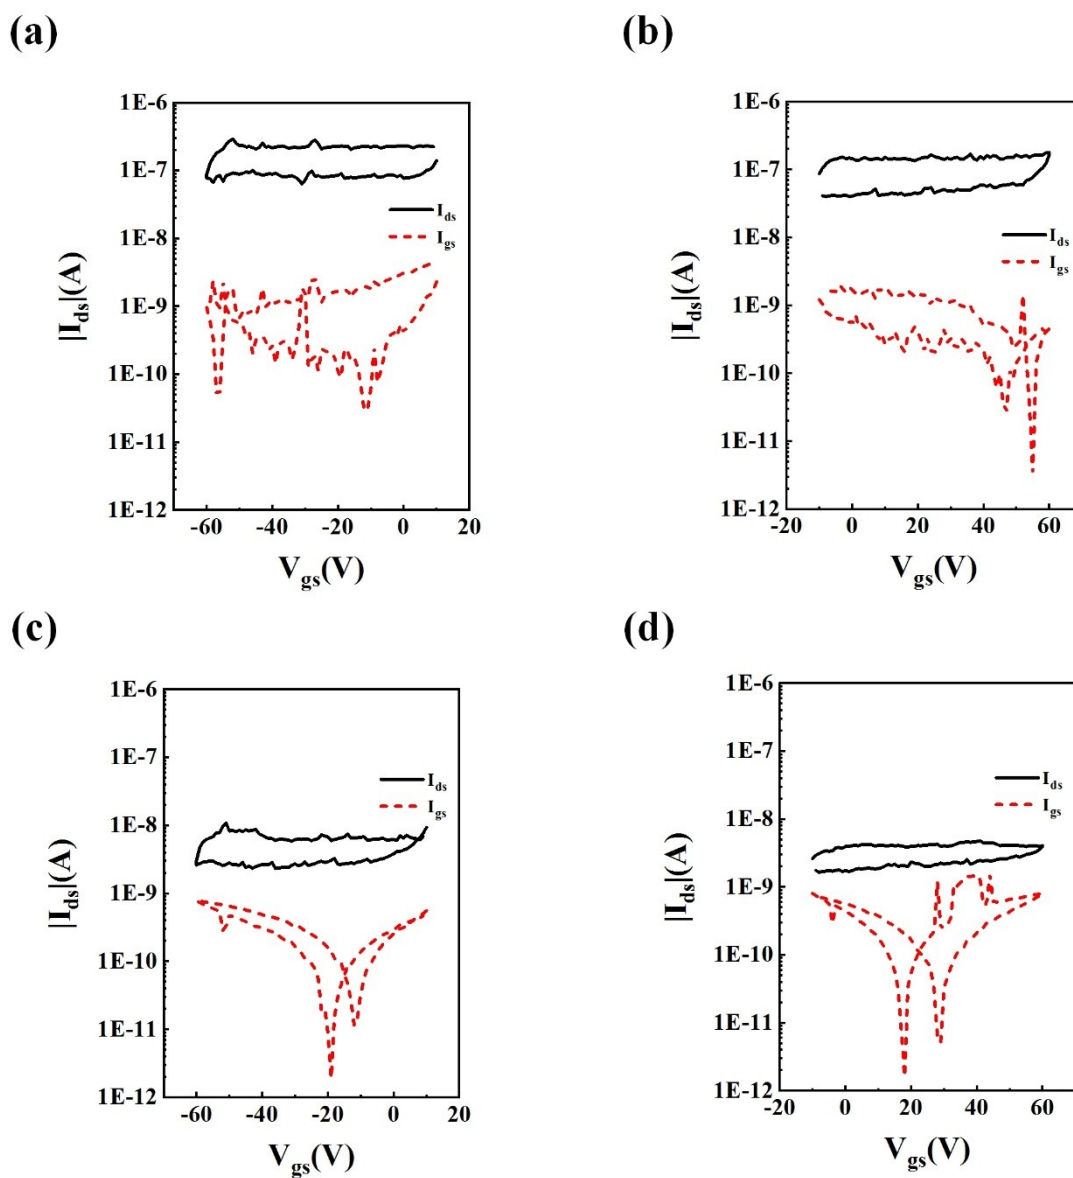

**Figure S7.** Transfer characteristics ( $I_{ds}$ - $V_{gs}$ ) of MAPbI<sub>3</sub> thin-film transistors under  $|V_{ds}|=60$  V (a) p-type and (b) n-type. Transfer characteristics ( $I_{ds}$ - $V_{gs}$ ) of MAPbI<sub>3</sub> nanowire transistors under  $|V_{ds}|=60$  V (a) p-type and (b) n-type.



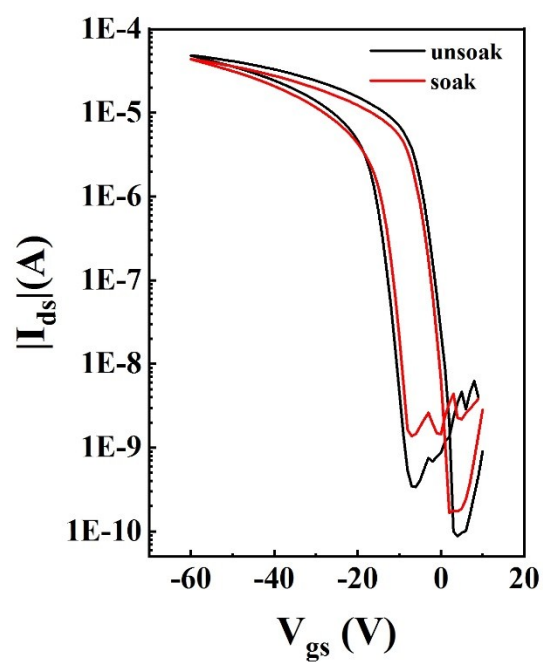

**Figure S8.** Transfer characteristics ( $I_{ds}$ - $V_{gs}$ ) of the thin-film (PDVT-10) before and after the immerse.

(a)

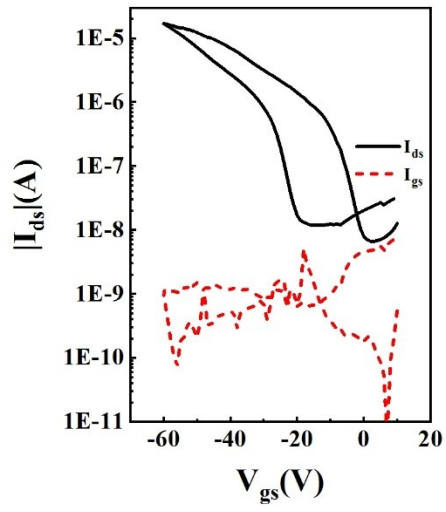

(b)

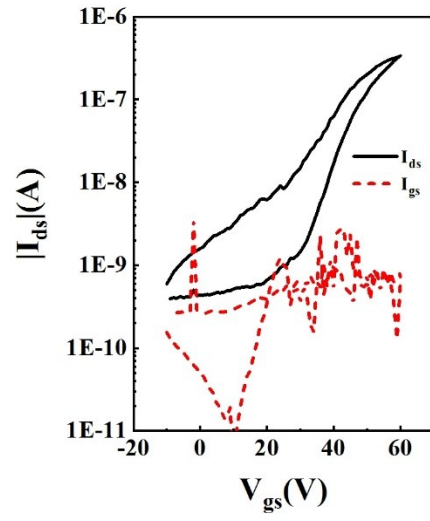

**Figure S9.** Transfer characteristics of (a) MAPbI<sub>3</sub>/PDVT-10 and (b) MAPbI<sub>3</sub>/N2200 nanowire heterojunction transistors at  $|V_{ds}|=60$  V.

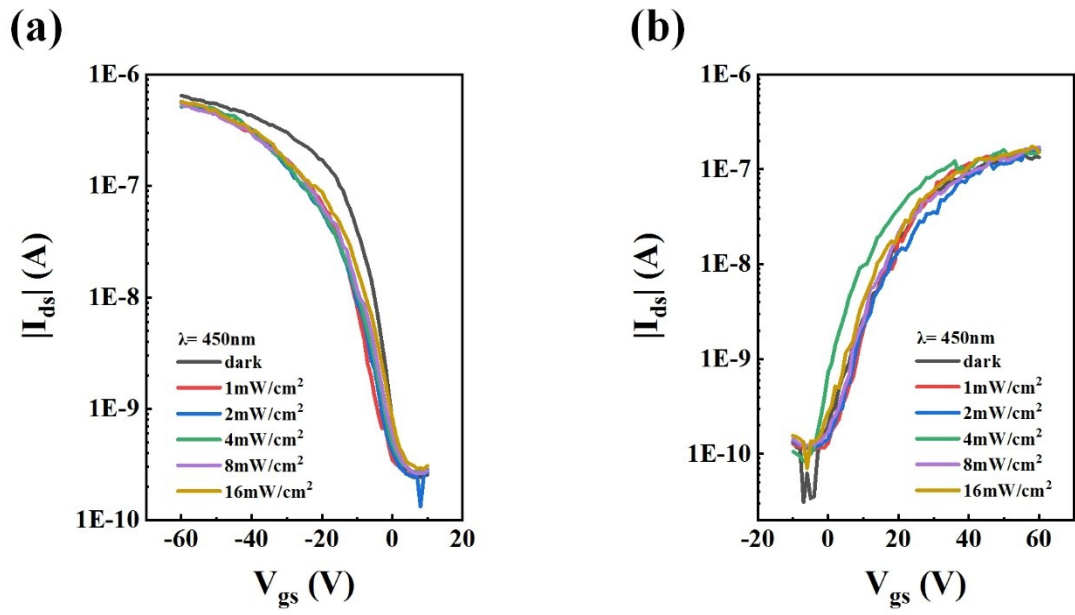

**Figure S10.** Transfer characteristics ( $I_{ds}$ - $V_{gs}$ ) of the (a) PDVT-10 and (b) N2200 nanowire transistors under light of 450 nm with power intensity varying from 0 to 16 mW/cm<sup>2</sup>.

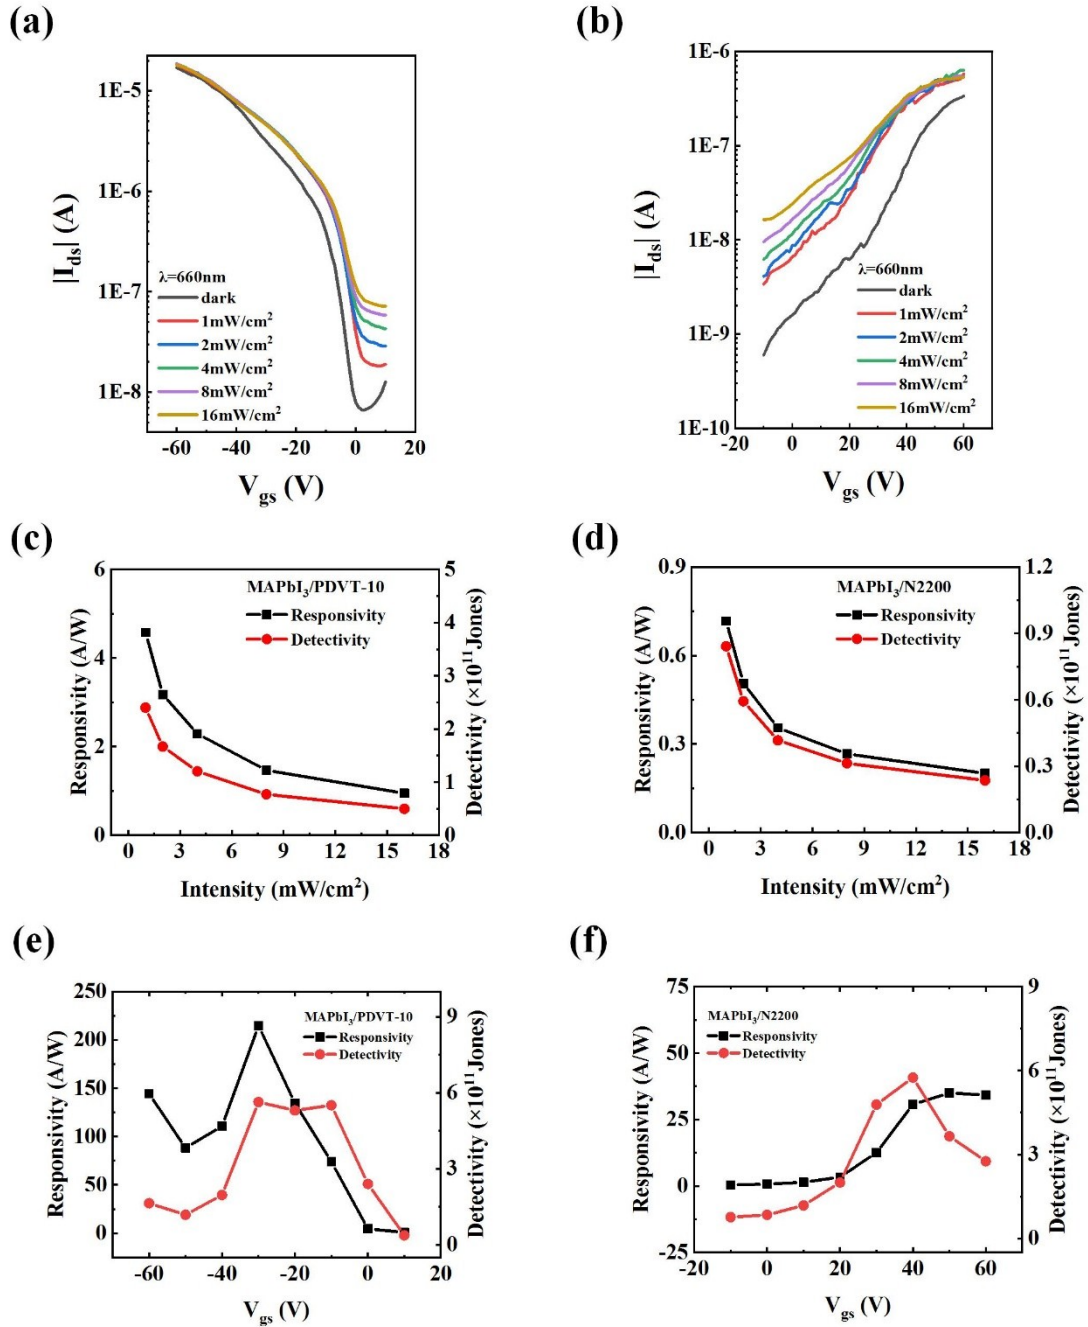

**Figure S11.** Photo response of MAPbI<sub>3</sub>/OSC nanowire heterojunction transistors. Transfer characteristics ( $I_{ds}$ - $V_{gs}$ ) of the (a) MAPbI<sub>3</sub>/PDVT-10 and (b) MAPbI<sub>3</sub>/N2200 nanowire heterojunction transistors under illumination of 660 nm light. Photoresponsivity ( $R$ ) and detectivity ( $D^*$ ) characteristics of (c) MAPbI<sub>3</sub>/PDVT-10 and (d) MAPbI<sub>3</sub>/N2200 nanowire heterojunction transistors at  $V_{gs} = 0$  V under illumination of 660 nm light. The dependences of  $R$  and  $D^*$  on  $V_{gs}$  under illumination of 660 nm light for (e) MAPbI<sub>3</sub>/PDVT-10 and (f) MAPbI<sub>3</sub>/N2200 nanowire heterojunction transistors.

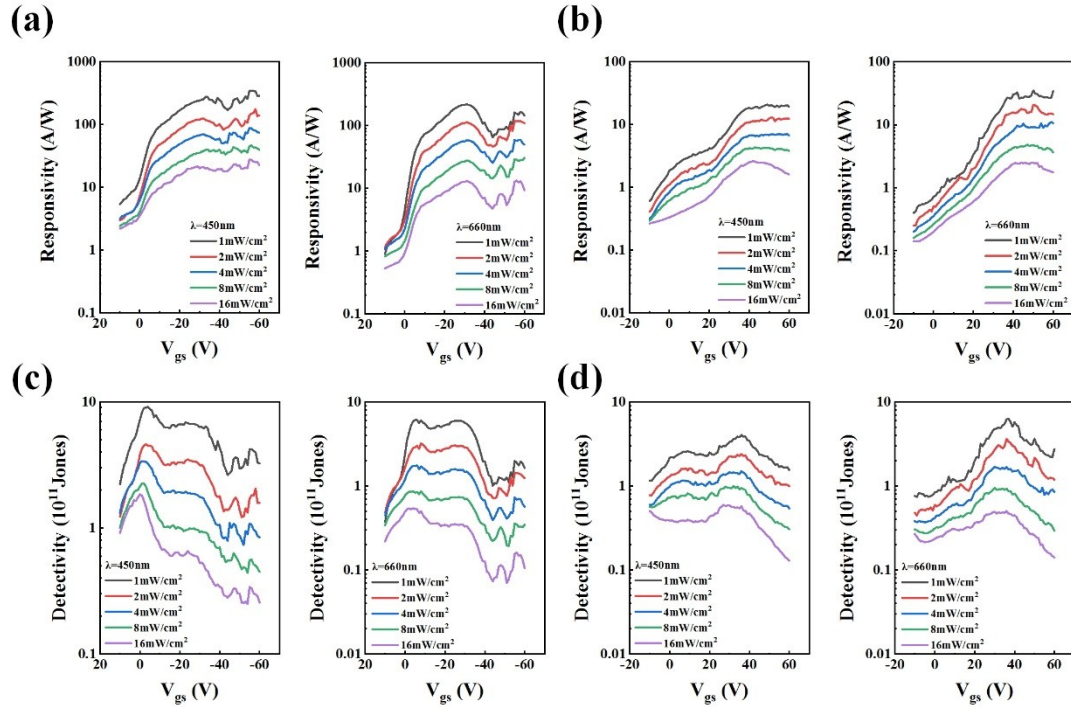

**Figure S12.** The dependences of  $R$  characteristics on  $V_{gs}$  under illumination of 450 nm or 660 nm light for (a) MAPbI<sub>3</sub>/PDVT-10, (b) MAPbI<sub>3</sub>/N2200 nanowire heterojunction phototransistors, respectively. The dependences of  $D^*$  on  $V_{gs}$  under illumination of 450 nm or 660 nm light for (c) MAPbI<sub>3</sub>/PDVT-10, (d) MAPbI<sub>3</sub>/N2200 nanowire heterojunction phototransistors, respectively.
